# Supplementary material for: A Review of Pseudorabies Virus Variants: Genomics, Vaccination, Transmission, and Zoonotic Potential
Source: MDPI journal article supplement (doi:10.3390/v14051003), 2022-05-09
Supplement: s1 [file s1]

**Supplemental Table S1. The genomic information of 39 strains of PRV.**

| <b>No.</b> | <b>Virus name</b>  | <b>Accession No.</b> | <b>Country</b> | <b>Year</b> |
|------------|--------------------|----------------------|----------------|-------------|
| 1          | HNX                | KM189912.1           | China          | 2012        |
| 2          | HNB                | KM189914.3           | China          | 2012        |
| 3          | HN1201             | KP722022.1           | China          | 2012        |
| 4          | JSY7               | MT150583.1           | China          | 2018        |
| 5          | TJ                 | KJ789182.1           | China          | 2012        |
| 6          | JSY13              | MT157263.1           | China          | 2018        |
| 7          | HLJ8               | KT824771.1           | China          | 2013        |
| 8          | HeN1               | KP098534.1           | China          | 2012        |
| 9          | JS-2012            | KP257591.1           | China          | 2012        |
| 10         | ZJ01               | KM061380.1           | China          | 2012        |
| 11         | DL14/08            | KU360259.1           | China          | 2014        |
| 12         | LA                 | KU552118.1           | China          | 1997        |
| 13         | GD0304             | MH582511.1           | China          | 2015        |
| 14         | Ea                 | KU315430.1           | China          | 1990        |
| 15         | Fa                 | KM189913.1           | China          | 1980s       |
| 16         | Ea (Hubei)         | KX423960.1           | China          | 1993        |
| 17         | SC                 | KT809429.1           | China          | 1986        |
| 18         | HLJ-2013           | MK080279.1           | China          | 2013        |
| 19         | hSD-1/2019         | MT468550.1           | China          | 2019        |
| 20         | GD-YH              | MT197597.1           | China          | 2014        |
| 21         | HuBXY/2018         | MT468549.1           | China          | 2018        |
| 22         | XJ                 | MW893682.1           | China          | 2015        |
| 23         | DCD-1              | OL639029.1           | China          | 2017        |
| 24         | JS2019             | MW805231.1           | China          | 2019        |
| 25         | HeNLH/2017         | MT775883.1           | China          | 2017        |
| 26         | SD18               | MT949536.1           | China          | 2020        |
| 27         | Qihe547            | KU056477.1           | China          | 2014        |
| 28         | JX/CH/2016         | MK806387.1           | China          | 2016        |
| 29         | GD1802             | MT949535.1           | China          | 2020        |
| 30         | Becker             | JF797219.1           | USA            | /           |
| 31         | NIA3               | KU900059.1           | UK             | 2008        |
| 32         | ADV32751/Italy2014 | KU198433.1           | Italy          | 2014        |
| 33         | Bartha             | JF797217.1           | Hungary        | /           |
| 34         | Kolchis            | KT983811.1           | Greece         | 2010        |
| 35         | Kaplan             | JF797218.1           | Hungary        | 2011        |
| 36         | Kaplan             | JQ809328.1           | Hungary        | 2012        |
| 37         | Kaplan             | KJ717942.1           | Hungary        | 2014        |
| 38         | DUL34Pass          | JQ809330.1           | Hungary        | /           |
| 39         | DUL34gfp           | JQ809329.1           | Hungary        | /           |
